# Supplementary material for: A new parameter describing fertility in rabbits at the farm level: the kit index
Source: Copernicus journal article supplement (doi:10.5194/aab-61-463-2018), 2018-12-06
Supplement: Supplementary file 1 [file aab-2018-43-supplement.xlsx]

## Sheet: Datentabelle Bauer
Lfd.Nr	vertauscht	Jahr	Linie	Stall	Gruppe	Deckdatum	Monat	Jahreszeit	Anz.Bes	Anz.TU	Trächt.rate	Anz.Würfe	Wurfrate	Anz.Jungt.leb.geb	Anz.Jungt.totgeb	Anz.Jungt.ges.geb	Anz.Jungt.abges	MWWurfgr.ges.geb	MWWurfgr.leb.geb	MWJungt.abges.Wurf	Jungtierindexges.geb100Häs	Jungtierindexleb.geb100Häs	Jungt.Verluste	filter_$
37	1	2015	2	2	7	42174	6	3	75	57	76	59	78.6667	532	22	554	482	9.38983	9.01695	8.16949	738.667	709.333	9.3985	0
38	0	2015	2	2	7	42216	7	3	80	52	65	51	63.75	424	14	438	386	8.58824	8.31373	7.56863	547.5	530	8.96226	0
39	1	2015	2	2	7	42258	9	4	75	30	40	37	49.3333	324	9	333	304	9	8.75676	8.21622	444	432	6.17284	0
40	0	2015	2	2	7	42300	10	4	62			45	72.5806	379	20	399	352	8.86667	8.42222	7.82222	643.548	611.29	7.12401	0
41	0	2015	2	2	7	42342	12	1	81	71	87.6543	66	81.4815	594	8	602		9.12121	9		743.21	733.333		0
61	0	2015	2	1	10	42153	5	2	70	47	67.1429	44	62.8571	379	12	391	351	8.88636	8.61364	7.97727	558.571	541.429	7.38786	0
62	1	2015	2	1	10	42195	7	3	73	46	63.0137	47	64.3836	395	15	410	360	8.7234	8.40426	7.65957	561.644	541.096	8.86076	0
63	0	2015	2	1	10	42237	8	3	88	59	67.0455	58	65.9091	485	5	490	472	8.44828	8.36207	8.13793	556.818	551.136	2.68041	0
64	0	2015	2	1	10	42279	10	4	86	57	66.2791	57	66.2791	539	12	551	515	9.66667	9.45614	9.03509	640.698	626.744	4.45269	0
65	0	2015	2	1	10	42321	11	4		46		40		383	4	387	344	9.675	9.575	8.6			10.1828	0
66	0	2015	2	1	10	42364	12	1	67	53	79.1045	52	77.6119	464	19	483	399	9.28846	8.92308	7.67308	720.896	692.537	14.0086	0
10	0	2016	2	1	10	42531	6	3	63	45	71.4286	43	68.254	332	14	346	302	8.04651	7.72093	7.02326	549.206	526.984	9.03614	1
11	1	2016	2	1	10	42573	7	3		39		40		284	11	295	250	7.375	7.1	6.25			11.9718	1
12	0	2016	2	1	10	42615	9	4	80	58	72.5	55	68.75	428	15	443	396	8.05455	7.78182	7.2	553.75	535	7.47664	1
13	0	2016	2	1	10	42657	10	4	92	68	73.913	54	58.6957	451	4	455	430	8.42593	8.35185	7.96296	494.565	490.217	4.65632	1
14	0	2016	2	1	10	42699	11	4	90	66	73.3333	62	68.8889	494	30	524	409	8.45161	7.96774	6.59677	582.222	548.889	17.2065	1
28	1	2016	2	2	7	42510	5	2	69	43	62.3188	54	78.2609	428	2	430	405	7.96296	7.92593	7.5	623.188	620.29	5.37383	1
29	0	2016	2	2	7	42552	7	3	72	47	65.2778	35	48.6111	288	6	294	274	8.4	8.22857	7.82857	408.333	400	4.86111	1
30	0	2016	2	2	7	42594	8	3	85	58	68.2353	55	64.7059	446	4	450	419	8.18182	8.10909	7.61818	529.412	524.706	6.05381	1
31	0	2016	2	2	7	42636	9	4	68	55	80.8824	51	75	430	13	443	375	8.68627	8.43137	7.35294	651.471	632.353	12.7907	1
32	0	2016	2	2	7	42678	11	4	80	55	68.75	54	67.5	412	0	412	368	7.62963	7.62963	6.81481	515	515	10.6796	1
33	0	2016	2	2	7	42720	12	1	130	88	67.6923	80	61.5385	617	34	651	543	8.1375	7.7125	6.7875	500.769	474.615	11.9935	1
42	0	2016	2	2	7	42384	1	1	91	69	75.8242	60	65.9341	523	8	531	497	8.85	8.71667	8.28333	583.516	574.725	4.97132	1
43	0	2016	2	2	7	42426	2	1	80	58	72.5	54	67.5	491	25	516	422	9.55556	9.09259	7.81481	645	613.75	14.053	1
44	0	2016	2	2	7	42468	4	2	81	55	67.9012	51	62.963	444	21	465	414	9.11765	8.70588	8.11765	574.074	548.148	6.75676	1
67	0	2016	2	1	10	42405	2	1	65	51	78.4615	46	70.7692	432	14	446	411	9.69565	9.3913	8.93478	686.154	664.615	4.86111	1
68	0	2016	2	1	10	42447	3	2	63	45	71.4286	45	71.4286	446	9	455	400	10.1111	9.91111	8.88889	722.222	707.937	10.3139	1
69	0	2016	2	1	10	42489	4	2	62	41	66.129	40	64.5161	322	8	330	300	8.25	8.05	7.5	532.258	519.355	6.8323	1
15	0	2017	2	1	10	42741	1	1	90	68	75.5556	67	74.4444	533	13	546	471	8.14925	7.95522	7.02985	606.667	592.222	11.6323	0
16	0	2017	2	1	10	42783	2	1	95	60	63.1579	59	62.1053	455	21	476	409	8.0678	7.71186	6.9322	501.053	478.947	10.1099	0
17	1	2017	2	1	10	42825	3	2	87	49	56.3218	53	60.9195	287	18	305	354	5.75472	5.41509	6.67925	350.575	329.885	-23.3449	0
18	1	2017	2	1	10	42872	5	2	90	41	45.5556	47	52.2222	346					7.3617			384.444		0
34	0	2017	2	2	7	42762	1	1	89	56	62.9213	56	62.9213	486	17	503	441	8.98214	8.67857	7.875	565.169	546.067	9.25926	0
35	0	2017	2	2	7	42804	3	2	75	61	81.3333	56	74.6667	483	8	491	452	8.76786	8.625	8.07143	654.667	644	6.41822	0
36	0	2017	2	2	7	42846	4	2	82	30	36.5854	29	35.3659	267	5	272	211	9.37931	9.2069	7.27586	331.707	325.61	20.9738	0
45	0	2015	4	2	2	42174	6	3	336	262	77.9762			2097			1884						10.1574	0
46	0	2015	4	2	2	42258	9	4		224		210		1895	35	1930	1825	9.19048	9.02381	8.69048			3.69393	0
47	0	2015	4	2	2	42300	10	4	310	230	74.1935	228	73.5484	2318	96	2414	1866	10.5877	10.1667	8.18421	778.71	747.742	19.4996	0
48	0	2015	4	2	2	42342	12	1	339	255	75.2212	226	66.6667	2089	70	2159		9.5531	9.24336		636.873	616.224		0
52	0	2015	4	1	1	42153	5	2	360	265	73.6111	258	71.6667	2524	70	2594	2189	10.0543	9.78295	8.4845	720.556	701.111	13.2726	0
53	0	2015	4	1	1	42195	7	3	349	262	75.0716	257	73.639	2305	123	2428	2041	9.44747	8.96887	7.94163	695.702	660.458	11.4534	0
54	1	2015	4	1	1	42237	8	3	348	250	71.8391	255	73.2759	2648	73	2721	2991	10.6706	10.3843	11.7294	781.897	760.92	-12.9532	0
55	0	2015	4	1	1	42279	10	4	368	284	77.1739	276	75	2792	70	2862	2636	10.3696	10.1159	9.55072	777.717	758.696	5.58739	0
56	0	2015	4	1	1	42321	11	4	375	298	79.4667	256	68.2667	2592	81	2673	2101	10.4414	10.125	8.20703	712.8	691.2	18.9429	0
57	0	2015	4	1	1	42364	12	1	338	282	83.432	277	81.9527	2957	60	3017	2510	10.8917	10.6751	9.06137	892.604	874.852	15.1167	0
1	0	2016	4	1	1	42531	6	3	290	255	87.931	243	83.7931	2341	60	2401	2128	9.88066	9.63374	8.7572	827.931	807.241	9.09868	1
2	0	2016	4	1	1	42573	7	3		238		231		2016	75	2091	1835	9.05195	8.72727	7.94372			8.97817	1
3	0	2016	4	1	1	42615	9	4	320	236	73.75	222	69.375	2022	51	2073	1813	9.33784	9.10811	8.16667	647.812	631.875	10.3363	1
4	0	2016	4	1	1	42657	10	4	295	228	77.2881	222	75.2542	2044	56	2100	1870	9.45946	9.20721	8.42342	711.864	692.881	8.51272	1
5	0	2016	4	1	1	42699	11	4	300	225	75	209	69.6667	1890	55	1945	1674	9.30622	9.04306	8.00957	648.333	630	11.4286	1
19	0	2016	4	2	2	42510	5	2	260	225	86.5385	220	84.6154	2126	53	2179	1946	9.90455	9.66364	8.84545	838.077	817.692	8.4666	1
20	0	2016	4	2	2	42552	7	3	290	231	79.6552	220	75.8621	1881	29	1910	1726	8.68182	8.55	7.84545	658.621	648.621	8.2403	1
21	0	2016	4	2	2	42604	8	3	330	257	77.8788	236	71.5152	2041	36	2077	1911	8.80085	8.64831	8.09746	629.394	618.485	6.36943	1
22	1	2016	4	2	2	42636	9	4	340	262	77.0588	263	77.3529	2305	60	2365	2079	8.9924	8.76426	7.90494	695.588	677.941	9.80477	1
23	0	2016	4	2	2	42678	11	4	310	231	74.5161	226	72.9032	2166	59	2225	1895	9.84513	9.58407	8.38496	717.742	698.71	12.5115	1
24	1	2016	4	2	2	42720	12	1	470	357	75.9574	360	76.5957	3191	121	3312	2781	9.2	8.86389	7.725	704.681	678.936	12.8486	1
49	0	2016	4	2	2	42384	1	1	250	191	76.4	184	73.6	1909	47	1956	1687	10.6304	10.375	9.16848	782.4	763.6	11.6291	1
50	0	2016	4	2	2	42426	2	1	275	179	65.0909	169	61.4545	1627	85	1712	1389	10.1302	9.62722	8.21893	622.545	591.636	14.6281	1
51	0	2016	4	2	2	42468	4	2	274	235	85.7664	230	83.9416	2082	124	2206	1870	9.5913	9.05217	8.13043	805.109	759.854	10.1825	1
58	0	2016	4	1	1	42405	2	1	316	247	78.1646	245	77.5316	2501	70	2571	2281	10.4939	10.2082	9.3102	813.608	791.456	8.79648	1
59	0	2016	4	1	1	42447	3	2	282	256	90.7801	256	90.7801	2662	75	2737	2606	10.6914	10.3984	10.1797	970.567	943.972	2.10368	1
60	0	2016	4	1	1	42489	4	2	268	211	78.7313	210	78.3582	2079	60	2139	1850	10.1857	9.9	8.80952	798.134	775.746	11.0149	1
6	0	2017	4	1	1	42741	1	1	310	244	78.7097	234	75.4839	2129	52	2181	1978	9.32051	9.09829	8.45299	703.548	686.774	7.09253	0
7	0	2017	4	1	1	42783	2	1	256	184	71.875	184	71.875	1520	39	1559	1482	8.47283	8.26087	8.05435	608.984	593.75	2.5	0
8	1	2017	4	1	1	42825	3	2	285	199	69.8246	204	71.5789	1846	104	1950	1606	9.55882	9.04902	7.87255	684.211	647.719	13.0011	0
9	1	2017	4	1	1	42872	5	2	312	221	70.8333	242	77.5641	2204	41	2245	2023	9.27686	9.10744	8.3595	719.551	706.41	8.21234	0
25	0	2017	4	2	2	42762	1	1	310	230	74.1935	220	70.9677	2006	85	2091	1797	9.50455	9.11818	8.16818	674.516	647.097	10.4187	0
26	0	2017	4	2	2	42804	3	2	310	220	70.9677	220	70.9677	2031	48	2079	1789	9.45	9.23182	8.13182	670.645	655.161	11.9153	0
27	1	2017	4	2	2	42846	4	2	318	219	68.8679	221	69.4969	2005	64	2069	1821	9.36199	9.0724	8.23982	650.629	630.503	9.17706	0
