# Supplementary material for: A new parameter describing fertility in rabbits at the farm level: the kit index
Source: Copernicus journal article supplement (doi:10.5194/aab-61-463-2018), 2018-12-06
Supplement: Supplementary file [file aab-61-463-2018-supplement-title-page.pdf › aab-61-463-2018-supplement-title-page.pdf]

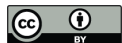

## *Supplement of*

# **A new parameter describing fertility in rabbits at the farm level: the kit index**

**Steffen Hoy**

*Correspondence to:* Steffen Hoy ([steffen.hoy@agrar.uni-giessen.de](mailto:steffen.hoy@agrar.uni-giessen.de))

- [aab-61-463-2018-supplement-title-page.pdf](#)
- [aab-2018-43-supplement.xlsx](#)

The copyright of individual parts of the supplement might differ from the CC BY 4.0 License.
